# Supplementary material for: Biophysical Mechanistic Modelling Quantifies the Effects of Plant Traits on Fire Severity: Species, Not Surface Fuel Loads, Determine Flame Dimensions in Eucalypt Forests
Source: PubMed Central journal article supplement (PMC4986950; doi:10.1371/journal.pone.0160715), 2016-08-16

## S1 Figure. Processes in one time step

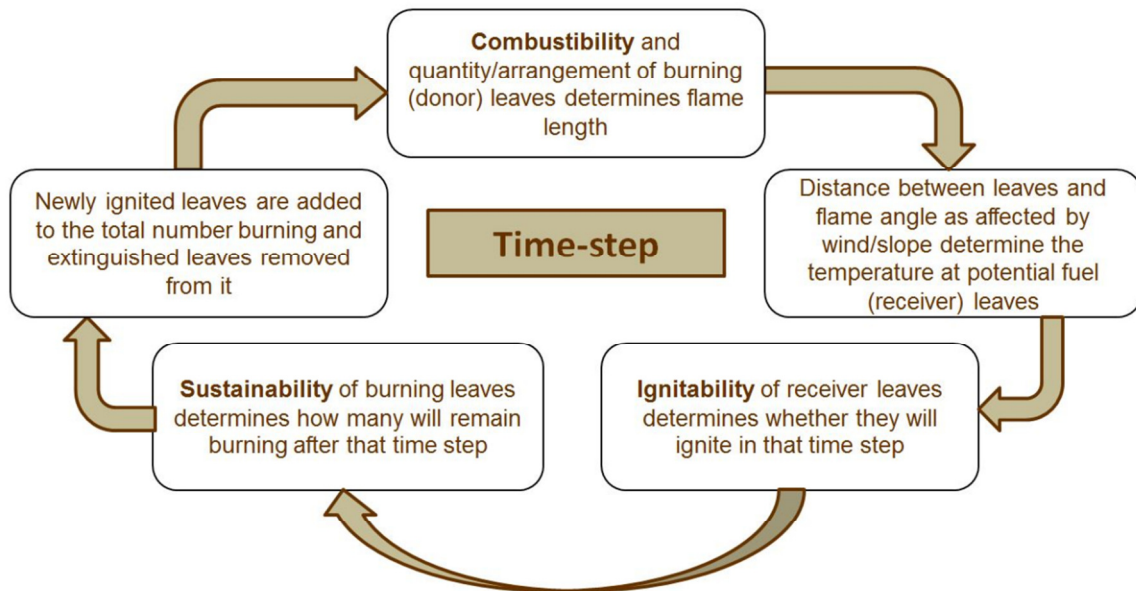

Supplement: pone.0160715.s001.pdf [file pone.0160715.s001.pdf]
