# Supplementary material for: Biophysical Mechanistic Modelling Quantifies the Effects of Plant Traits on Fire Severity: Species, Not Surface Fuel Loads, Determine Flame Dimensions in Eucalypt Forests
Source: PubMed Central journal article supplement (PMC4986950; doi:10.1371/journal.pone.0160715), 2016-08-16
Supplement: pone.0160715.s003.pdf [file pone.0160715.s003.pdf]

# S3 Figure. Donor Flammability

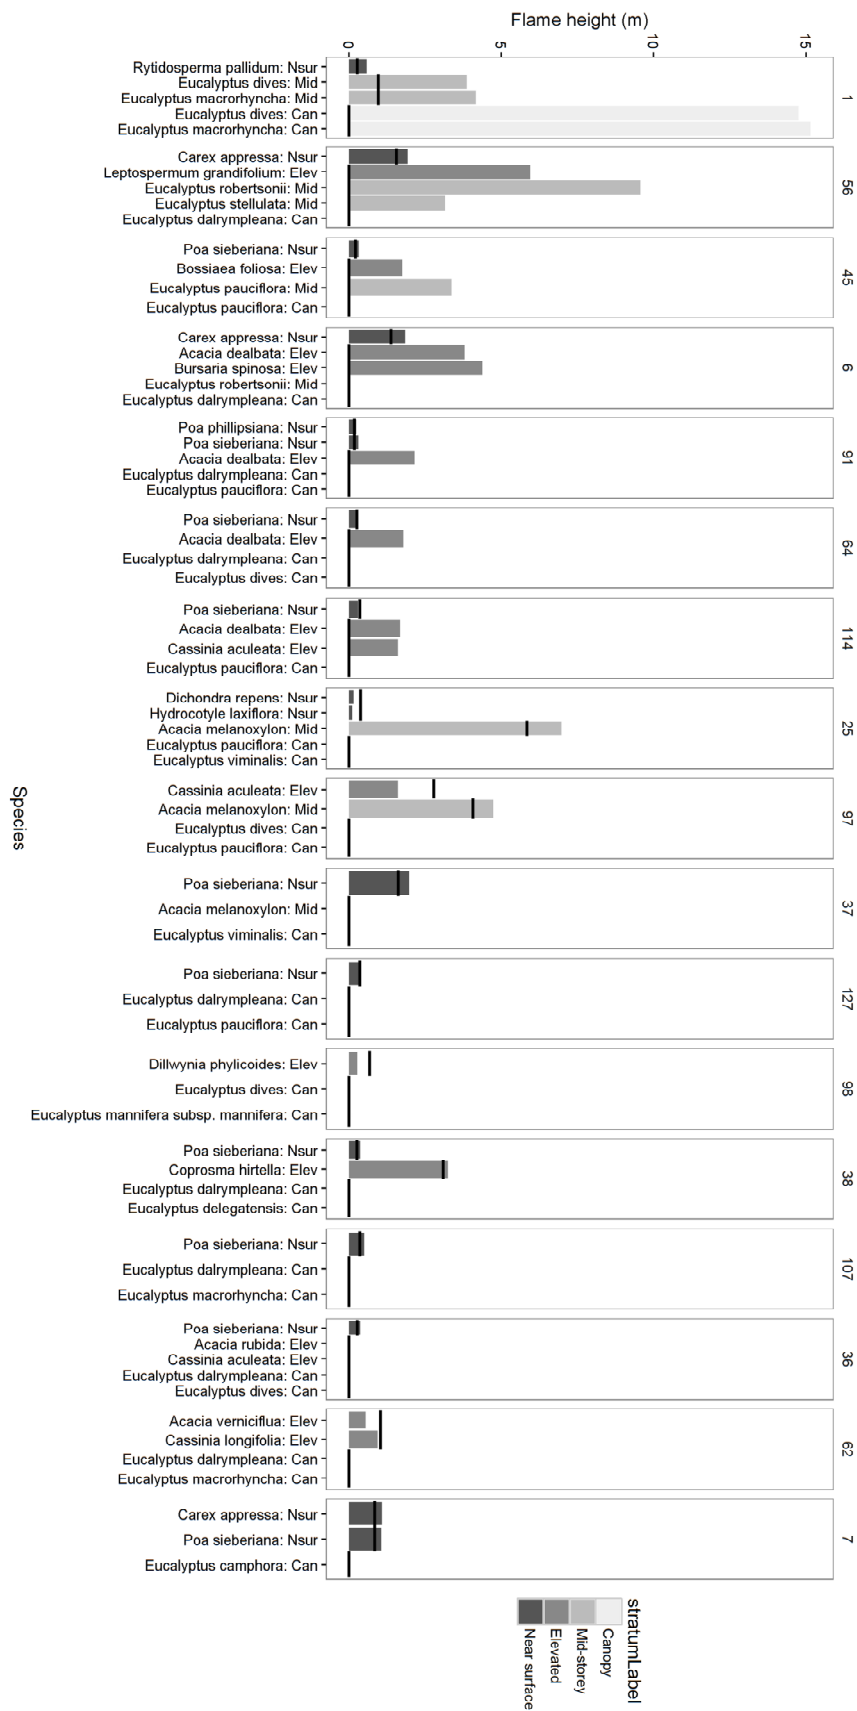

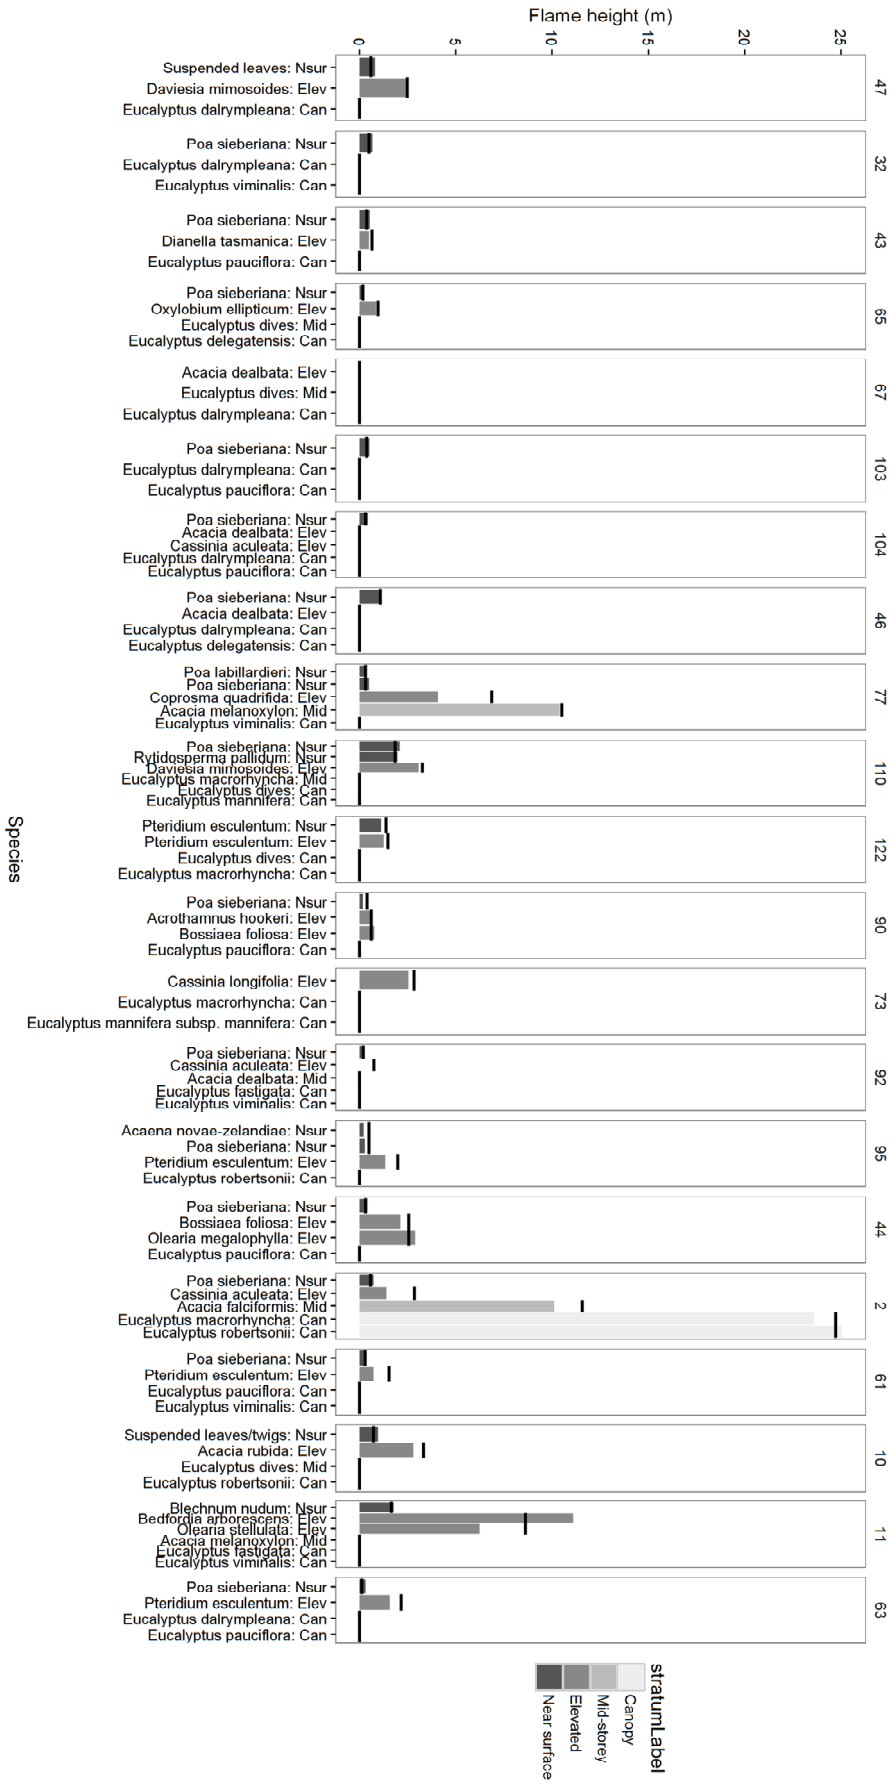

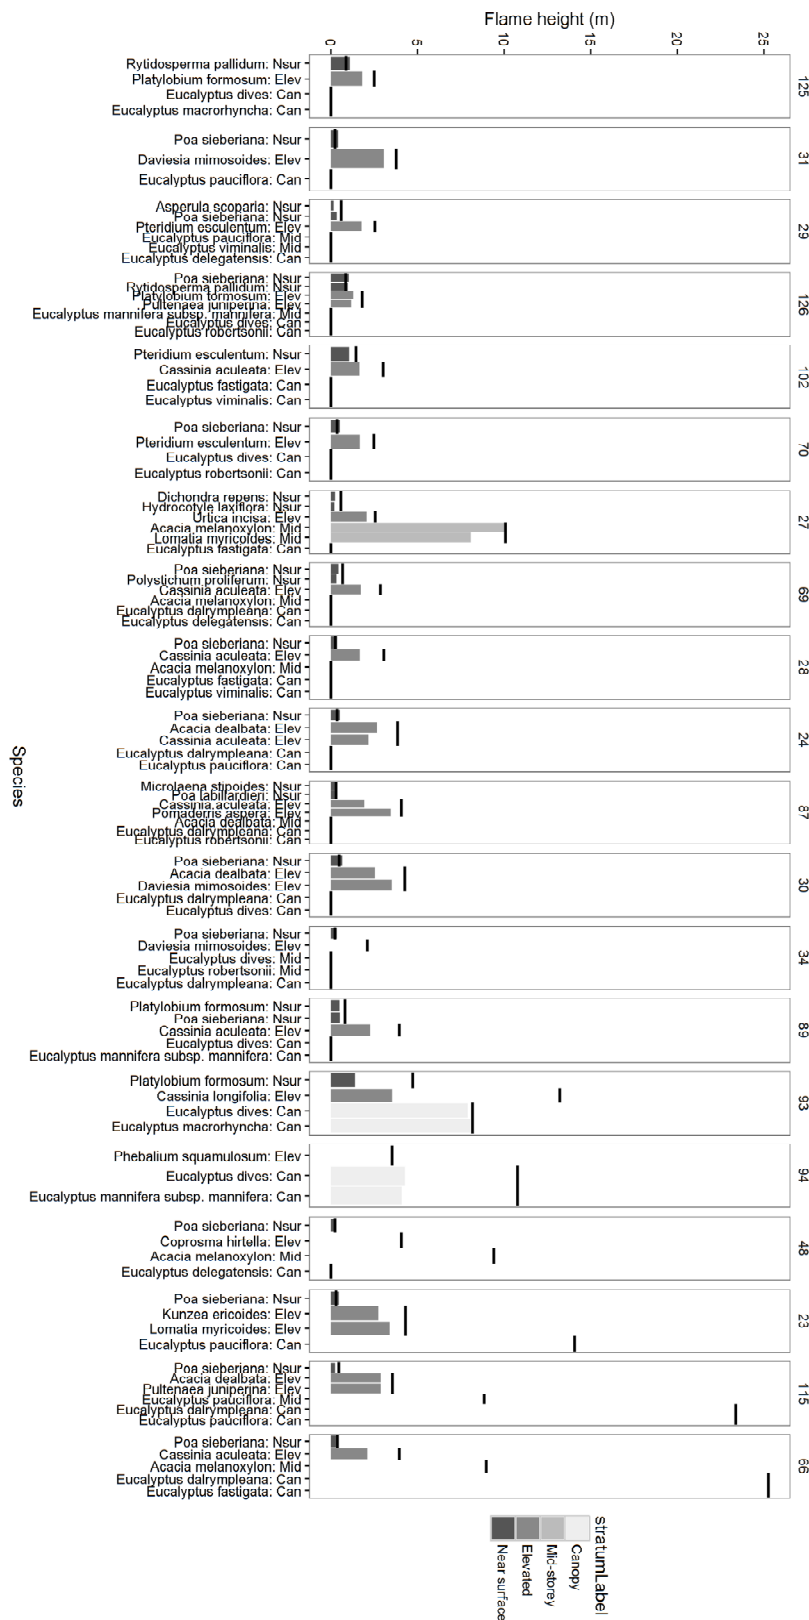

Donor flame height per species, stratum and site. Grey bars show flame heights per species from FSL and horizontal lines show flame heights from mean species in FS. Sites are ordered by delta flame height.
