# Supplementary material for: Biophysical Mechanistic Modelling Quantifies the Effects of Plant Traits on Fire Severity: Species, Not Surface Fuel Loads, Determine Flame Dimensions in Eucalypt Forests
Source: PubMed Central journal article supplement (PMC4986950; doi:10.1371/journal.pone.0160715), 2016-08-16
Supplement: pone.0160715.s005.pdf [file pone.0160715.s005.pdf]

## S2 Table. Sub-models used in the FFM for this study

| Code                 | Sub-model                                            | Notes                                                                     | Source                         |
|----------------------|------------------------------------------------------|---------------------------------------------------------------------------|--------------------------------|
| <b>FLAMMABILITY</b>  |                                                      |                                                                           |                                |
| TTI                  | Time to ignition                                     | Predicted from temperature, moisture and leaf thickness                   | [1] Eq. 4.10                   |
| E                    | Endotherm                                            | Entered as either measured value or modelled from silica-free ash content | [2] Eq. 1                      |
| FR <sub>h</sub>      | Flame residence in a heated leaf                     | Predicted from leaf dimensions and moisture                               | [1] Eq.4.21                    |
| FR <sub>u</sub>      | Flame residence in an unheated leaf                  | Cut-off temperature and default duration of 1s                            | -                              |
| FR <sub>s</sub>      | Flame residence in surface fuel                      | Predicted from mean fuel diameter                                         | [3]                            |
| $\lambda_l$          | Flame length from a leaf                             | Predicted from leaf dimensions and moisture                               | [1] Eqs. 4.18 - 4.20           |
| T <sub>max</sub>     | Maximum flame temperature                            | Two values recorded in settings                                           | [4,5]                          |
| L <sub>n</sub>       | Number of leaves per branch                          | Calculated from leaf separation, stem ramification and branch diameter    | [1] Eq. 5.69                   |
| <b>FLAME PHYSICS</b> |                                                      |                                                                           |                                |
| M <sub>lat</sub>     | Lateral merging of flames                            | Predicted from flame length and separation                                | [6]                            |
| L <sub>lon</sub>     | Longitudinal merging of flames                       | Predicted from flame length and depth ignited                             | [7]                            |
| $\theta_{f_w}$       | Effect of wind on flame angle                        | Predicted from flame length and wind speed                                | [8]                            |
| $\theta_{f_s}$       | Effect of slope on flame angle                       | Predicted for either point or line fires                                  | [1] Eqs. 5.30, 5.33            |
| $\theta_{f_c}$       | Interaction of wind and slope effects on flame angle | Cut-off value defines where competing effects dominate                    | -                              |
| $\theta_{f_t}$       | Effects of turbulence on flame angle                 | Set value defines a +/- value to apply to flame angle                     | -                              |
| $\lambda_s$          | Surface flame length                                 | Empirical model                                                           | [9]                            |
| ROS <sub>s</sub>     | Surface flame ROS                                    | Empirical model                                                           | [9]                            |
| T <sub>p</sub>       | Plume temperature                                    | Empirical model                                                           | [10]                           |
| <b>MICROCLIMATE</b>  |                                                      |                                                                           |                                |
| W <sub>s</sub>       | Wind profile                                         | Empirical model                                                           | [1] Eq. 6.18 adjusted, [11–13] |
| T <sub>a</sub>       | Ambient temperature                                  | Assumed equal throughout                                                  | -                              |

## References

1. Zylstra P. Forest Flammability: Modelling and Managing a Complex System [Internet]. University of NSW, Australian Defence Force Academy. 2011. doi:10.13140/2.1.3722.0166
2. Philpot CW. Influence of mineral content on the pyrolysis of plant materials. *For Sci.* 1970;16: 461–471.
3. Burrows ND. Flame residence times and rates of weight loss of eucalypt forest fuel particles. *Int J Wildl Fire.* 2001;10: 137–143.
4. Gould JS, Mccaw WL, Cheney NP, Ellis PF, Knight I, Sullivan AL. Project Vesta – fire in dry Eucalypt forest: fuel structure, fuel dynamics and fire behaviour. Canberra ACT, Perth WA; 2007.
5. Silvani X, Morandini F. Fire spread experiments in the field: Temperature and heat fluxes measurements. *Fire Saf J.* 2009;44: 279–285. doi:10.1016/j.firesaf.2008.06.004
6. Gill AM. Fire behaviour in discontinuous fuels: a contract report to the New South Wales National Parks and Wildlife Service. Canberra, ACT; 1990.
7. Mitler HE, Steckler KD. SPREAD - a model of flame spread on vertical surfaces. NISTIR 5619 [Internet]. Gaithersburg, MD; 1993. Available: <http://fire.nist.gov/bfrlpubs/fire95/PDF/f95134.pdf>
8. Van Wagner CE. Height of crown scorch in forest fires. *Can J For Res.* 1973;3: 373–378.
9. Burrows ND. Fire behaviour in Jarrah forest fuels: 1. Laboratory experiments. *CALMScience.* 1999;3: 31–56.
10. Weber RO, Gill AM, Lyons PRA, Moore PHR, Bradstock RA, Mercer GN. Modelling wildland fire temperatures. *CALMScience Suppl.* 1995;4: 23–26.
11. Cionco RM. A wind-profile index for canopy flow. *Boundary-Layer Meteorol.* 1972;3: 255–263.
12. Cionco RM. A mathematical model for air flow in a vegetative canopy. 1966. pp. 149–163.
13. Cionco RM. Analysis of canopy index values for various canopy densities. *Boundary-Layer Meteorol.* 1978;15: 81–93.
