# Supplementary material for: Biophysical Mechanistic Modelling Quantifies the Effects of Plant Traits on Fire Severity: Species, Not Surface Fuel Loads, Determine Flame Dimensions in Eucalypt Forests
Source: PubMed Central journal article supplement (PMC4986950; doi:10.1371/journal.pone.0160715), 2016-08-16
Supplement: pone.0160715.s006.pdf [file pone.0160715.s006.pdf]

### S3 Table. Ignition process in the FFM

| Step | Action                                                                                                                                                                                                 | Detail                                                                                                                                                                                                                                                                                                                                                                                                         |
|------|--------------------------------------------------------------------------------------------------------------------------------------------------------------------------------------------------------|----------------------------------------------------------------------------------------------------------------------------------------------------------------------------------------------------------------------------------------------------------------------------------------------------------------------------------------------------------------------------------------------------------------|
| IF   | Flame can ignite new leaves across a gap                                                                                                                                                               | Distance is found geometrically from the gap between burning fuel and potential fuel, and the angle at which the plume crosses that gap.<br><br>Air temperature at the potential fuel is calculated using a $T_p$ model for that distance, and the characteristics of the contributing flame that affect the $T_p$ model.<br><br>Ignition occurs when $TTI \leq 1$ s (one time-step)                           |
| THEN | <ol style="list-style-type: none"> <li>1. Add newly ignited fuel,</li> <li>2. Remove newly consumed fuel</li> <li>3. Calculate new flame traits</li> </ol>                                             | <p>Add the number of leaves that were ignited to those already burning and remove the leaves that have been burning for at least the period of their calculated flame duration.</p> <p>Calculate the flame length from individual burning leaves, then the merged flame length from all of these combined.</p> <p>Find the wind speed at that point, and then the angle of the flame.</p>                      |
| ELSE | <ol style="list-style-type: none"> <li>1. Treat partial drying of leaves that failed to ignite as pre-heating</li> <li>2. Remove newly consumed fuel</li> <li>3. Calculate new flame traits</li> </ol> | <p>Reduce the TTI of the leaves by the amount dried.</p> <p>Remove from the total of leaves already burning those that have been burning for at least the period of their calculated flame duration.</p> <p>Calculate the flame length from individual burning leaves, then the merged flame length from all of these combined.</p> <p>Find the wind speed at that point, and then the angle of the flame.</p> |
