# Supplementary material for: Biophysical Mechanistic Modelling Quantifies the Effects of Plant Traits on Fire Severity: Species, Not Surface Fuel Loads, Determine Flame Dimensions in Eucalypt Forests
Source: PubMed Central journal article supplement (PMC4986950; doi:10.1371/journal.pone.0160715), 2016-08-16
Supplement: pone.0160715.s007.pdf [file pone.0160715.s007.pdf]

**S4 Table. Plant and flame traits, and resultant heating as shown in S2 Figure.**

|       | Leaf traits                                                    |                                                                      |                                              | Flame traits and heating      |                             |                                       |
|-------|----------------------------------------------------------------|----------------------------------------------------------------------|----------------------------------------------|-------------------------------|-----------------------------|---------------------------------------|
|       | <b>Ignitability</b><br>(Min. temp for ignition within 1 s, °C) | <b>Combustibility</b><br>(Ratio of flame extension to depth ignited) | <b>Sustainability</b><br>(Flame duration, s) | <b>Max flame height ratio</b> | <b>Flame duration ratio</b> | <b>Max temp at next stratum ratio</b> |
| Row 1 | 1000                                                           | 1, 2                                                                 | 2                                            | 1.5                           | 1.0                         | 2.1                                   |
| Row 2 | 600, 1200*                                                     | 1.5                                                                  | 2                                            | 1.5                           | 0.5                         | 1.9                                   |
| Row 3 | 1000                                                           | 1.5                                                                  | 2, 4                                         | 1.2                           | 1.5                         | 1.4                                   |

\*Where two numbers are given, the first is for sp. 1 and the second for sp. 2.
