# Supplementary material for: Biophysical Mechanistic Modelling Quantifies the Effects of Plant Traits on Fire Severity: Species, Not Surface Fuel Loads, Determine Flame Dimensions in Eucalypt Forests
Source: PubMed Central journal article supplement (PMC4986950; doi:10.1371/journal.pone.0160715), 2016-08-16
Supplement: pone.0160715.s008.pdf [file pone.0160715.s008.pdf]

## S5 Table. Species leaf traits used in the FFM for this study

| Species                                                   | Thickness (mm)    | Moisture (%ODW) | Endotherm (deg. C) | Width (mm)        | Length (mm)        | Ramification     | Leaf separation (cm) | Mean clump width (cm) | Range | Mean clump separation (cm) | Range |
|-----------------------------------------------------------|-------------------|-----------------|--------------------|-------------------|--------------------|------------------|----------------------|-----------------------|-------|----------------------------|-------|
| <i>Acacia dealbata</i> subsp. <i>subalpina</i>            | 0.22 <sup>a</sup> | 100             | 220 <sup>a</sup>   | 0.5 <sup>a</sup>  | 2.7 <sup>a</sup>   | 4.8 <sup>a</sup> | 0.18 <sup>a</sup>    | 60                    | 83    | 18                         | 22    |
| <i>Acacia falciformis</i>                                 | 0.30              | 100             | 260                | 28.2              | 102.3              | 4.6              | 1.35                 | 142                   | 0     | 91                         | 0     |
| <i>Acacia melanoxylon</i>                                 | 0.21              | 150             | 260                | 11.0              | 95.4               | 5.6              | 1.60                 | 135                   | 236   | 35                         | 45    |
| <i>Acacia rubida</i>                                      | 0.36              | 100             | 260                | 14.2              | 87.3               | 2.4              | 1.50                 | 46                    | 0     | 38                         | 0     |
| <i>Acacia verniciflua</i>                                 | 0.26              | 100             | 260                | 4.1               | 24.5               | 2.8              | 1.62                 | 93.8                  | 0     | 31.3                       | 0     |
| <i>Acaena novae-zelandiae</i>                             | 0.09              | 100             | 260                | 3.9               | 7.2                | 3.0              | 0.24                 | 16.8                  | 0     | 0.0                        | 0     |
| <i>Acrothamnus hookeri</i>                                | 0.22              | 100             | 260                | 1.7               | 6.3                | 4.6              | 0.14                 | 7.7                   | 0     | 4.9                        | 0     |
| <i>Asperula scoparia</i>                                  | 0.11              | 150             | 260                | 0.5               | 2.7                | 4.0              | 0.11                 | 10.0                  | 0     | 0.0                        | 0     |
| <i>Bedfordia arborescens</i>                              | 0.28 <sup>a</sup> | 200             | 260                | 25.8 <sup>a</sup> | 136.6 <sup>a</sup> | 3.0 <sup>a</sup> | 0.78 <sup>a</sup>    | 79.5                  | 0     | 11.4                       | 0     |
| <i>Blechnum nudum</i>                                     | 0.20              | 200             | 260                | 14.1              | 128.6              | 1.0              | 0.43                 | 19.4                  | 0     | 8.3                        | 0     |
| <i>Bossiaea foliosa</i>                                   | 0.17 <sup>a</sup> | 100             | 300 <sup>a</sup>   | 5.0 <sup>a</sup>  | 5.0 <sup>a</sup>   | 5.0 <sup>a</sup> | 0.10 <sup>a</sup>    | 29                    | 56    | 6                          | 3     |
| <i>Bursaria spinosa</i>                                   | 0.24              | 100             | 260                | 4.3               | 14.8               | 4.5              | 0.25                 | 95                    | 0     | 11                         | 0     |
| <i>Carex appressa</i>                                     | 0.30              | 100             | 260                | 11.0              | 150.0              | 1.0              | 2.00                 | 93                    | 60    | 0                          | 0     |
| <i>Cassinia aculeata</i>                                  | 0.29              | 100             | 220                | 0.5               | 9.4                | 4.8              | 0.18                 | 50                    | 60    | 19                         | 29    |
| <i>Cassinia longifolia</i>                                | 0.17              | 100             | 220                | 4.0               | 50.2               | 5.0              | 0.42                 | 70                    | 40    | 27                         | 7     |
| <i>Coprosma hirtella</i>                                  | 0.67              | 100             | 260                | 20.9              | 34.1               | 5.2              | 0.71                 | 78                    | 74    | 22                         | 19    |
| <i>Coprosma quadrifida</i>                                | 0.14              | 100             | 260                | 3.6               | 6.3                | 5.6              | 0.21                 | 88                    | 0     | 32                         | 0     |
| <i>Daviesia mimosoides</i> subsp. <i>mimosoides</i>       | 0.38 <sup>a</sup> | 100             | 280 <sup>a</sup>   | 10.8 <sup>a</sup> | 58.2 <sup>a</sup>  | 2.2 <sup>a</sup> | 1.26 <sup>a</sup>    | 68                    | 44    | 19                         | 7     |
| <i>Dianella tasmanica</i>                                 | 0.44              | 150             | 260                | 6.4               | 150.0              | 1.0              | 15.30                | 27.6                  | 0.0   | 0.0                        | 0.0   |
| <i>Dichondra repens</i>                                   | 0.30              | 150             | 260                | 11.0              | 18.9               | 1.0              | 0.56                 | 11                    | 18    | 3                          | 5     |
| <i>Dicksonia antarctica</i>                               | 0.10              | 200             | 260                | 2.5               | 4.5                | 3.0              | 0.15                 | 286                   | 0     | 36                         | 0     |
| <i>Dillwynia phyllicoides</i>                             | 0.22              | 100             | 260                | 1.7               | 5.5                | 3.6              | 0.14                 | 18                    | 0     | 7                          | 0     |
| <i>Eucalyptus camphora</i> subsp. <i>humeana</i>          | 0.34              | 100             | 220                | 49.8              | 94.0               | 5.5              | 3.23                 | 400                   | 0     | 234                        | 0     |
| <i>Eucalyptus dalrympleana</i> subsp. <i>dalrympleana</i> | 0.41              | 100             | 220                | 20.5              | 134.0              | 5.0              | 1.83                 | 328                   | 506   | 110                        | 139   |
| <i>Eucalyptus delegatensis</i> subsp. <i>delegatensis</i> | 0.37 <sup>a</sup> | 100             | 220                | 29.7 <sup>a</sup> | 131.6 <sup>a</sup> | 5.4 <sup>A</sup> | 2.48 <sup>A</sup>    | 404                   | 448   | 120                        | 101   |
| <i>Eucalyptus dives</i>                                   | 0.40 <sup>B</sup> | 100             | 220                | 15.8 <sup>B</sup> | 103.6 <sup>B</sup> | 5.0              | 1.66                 | 250                   | 380   | 98                         | 123   |
| <i>Eucalyptus fastigata</i>                               | 0.34              | 100             | 220                | 23.8              | 96.0               | 5.0              | 0.58                 | 409                   | 143   | 144                        | 68    |
| <i>Eucalyptus macrorhyncha</i>                            | 0.40              | 100             | 220                | 16.5              | 80.2               | 6.0              | 1.17                 | 206                   | 296   | 90                         | 161   |
| <i>Eucalyptus mannifera</i> subsp. <i>mannifera</i>       | 0.39              | 100             | 220                | 7.6               | 118.0              | 4.8              | 1.22                 | 227                   | 238   | 110                        | 141   |
| <i>Eucalyptus pauciflora</i>                              | 0.49 <sup>a</sup> | 100             | 220                | 26.7 <sup>a</sup> | 67.9 <sup>a</sup>  | 5.0 <sup>a</sup> | 1.06 <sup>a</sup>    | 233                   | 386   | 106                        | 205   |
| <i>Eucalyptus robertsonii</i> subsp. <i>robertsonii</i>   | 0.23              | 100             | 220                | 16.0              | 80.9               | 5.5              | 0.60                 | 255                   | 393   | 119                        | 196   |
| <i>Eucalyptus stellulata</i>                              | 0.43 <sup>a</sup> | 100             | 220                | 20.6 <sup>a</sup> | 59.4 <sup>a</sup>  | 6.4 <sup>a</sup> | 1.41 <sup>a</sup>    | 92                    | 0     | 30                         | 0     |
| <i>Eucalyptus viminalis</i>                               | 0.38              | 100             | 220                | 10.6              | 59.8               | 5.5              | 1.24                 | 333                   | 268   | 133                        | 103   |
| <i>Hydrocotyle laxiflora</i>                              | 0.27              | 150             | 260                | 17.4              | 19.7               | 1.0              | 5.00                 | 11                    | 18    | 3                          | 5     |
| <i>Kunzea ericoides</i>                                   | 0.22              | 100             | 220                | 2.6               | 10.1               | 4.8              | 0.20                 | 86                    | 0     | 14                         | 0     |
| <i>Leptospermum grandifolium</i>                          | 0.25              | 100             | 220                | 3.9               | 10.6               | 5.2              | 0.12                 | 184                   | 0     | 71                         | 0     |

|                                                   |                   |     |                  |                   |                   |                  |                   |     |    |    |    |
|---------------------------------------------------|-------------------|-----|------------------|-------------------|-------------------|------------------|-------------------|-----|----|----|----|
| <i>Lomatia myricoides</i>                         | 0.25              | 100 | 260              | 4.4               | 91.9              | 3.0              | 1.07              | 95  | 19 | 20 | 12 |
| <i>Microlaena stipoides</i>                       | 0.15 <sup>c</sup> | 150 | 260              | 3.9               | 150.0             | 1.0              | 1.58              | 30  | 0  | 0  | 0  |
| <i>Olearia megalophylla</i>                       | 0.56              | 100 | 260              | 12.8              | 44.1              | 3.2              | 0.53              | 64  | 0  | 8  | 0  |
| <i>Olearia stellulata</i>                         | 0.23              | 100 | 260              | 4.1               | 11.1              | 2.6              | 0.19              | 80  | 0  | 11 | 0  |
| <i>Oxylobium ellipticum</i>                       | 0.28              | 100 | 260              | 9.0               | 21.2              | 3.8              | 0.36              | 41  | 0  | 4  | 0  |
| <i>Phebalium squamulosum subsp. ozothamnoides</i> | 0.31              | 100 | 260              | 1.6               | 11.1              | 4.8              | 0.17              | 88  | 0  | 19 | 0  |
| <i>Platylobium formosum</i>                       | 0.31              | 100 | 260              | 24.6              | 34.9              | 1.6              | 1.99              | 26  | 21 | 7  | 13 |
| <i>Poa helmsii</i>                                | 0.16              | 100 | 350 <sup>d</sup> | 1.3               | 150.0             | 1.0              | 0.38              | 130 | 0  | 0  | 0  |
| <i>Poa labillardierei</i>                         | 0.25              | 100 | 350 <sup>d</sup> | 1.3               | 150.0             | 1.0              | 0.92              | 28  | 5  | 0  | 0  |
| <i>Poa phillipsiana</i>                           | 0.17              | 100 | 350 <sup>d</sup> | 0.5               | 150.0             | 1.0              | 0.44              | 13  | 0  | 0  | 0  |
| <i>Poa sieberiana</i>                             | 0.16              | 100 | 350 <sup>d</sup> | 1.3               | 150.0             | 1.0              | 0.38              | 21  | 87 | 0  | 0  |
| <i>Polystichum proliferum</i>                     | 0.24              | 200 | 347 <sup>d</sup> | 5.0               | 11.3              | 2.0              | 0.33              | 17  | 0  | 0  | 0  |
| <i>Pomaderris aspera</i>                          | 0.31 <sup>a</sup> | 100 | 260              | 13.1 <sup>a</sup> | 42.2 <sup>a</sup> | 4.0 <sup>a</sup> | 1.67 <sup>a</sup> | 51  | 0  | 18 | 0  |
| <i>Pteridium esculentum</i>                       | 0.21              | 100 | 260              | 2.2               | 8.7               | 4.0              | 0.20              | 31  | 6  | 14 | 3  |
| <i>Pultenaea juniperina</i>                       | 0.23              | 100 | 260              | 1.2               | 5.5               | 6.4              | 0.07              | 43  | 10 | 13 | 0  |
| <i>Rytidosperma pallidum</i>                      | 0.34              | 100 | 260              | 2.4               | 150.0             | 1.0              | 0.78              | 74  | 34 | 0  | 0  |
| <i>Urtica incisa</i>                              | 0.21              | 200 | 260              | 55.5              | 62.5              | 2.2              | 2.35              | 10  | 0  | 15 | 0  |

Data collected as part of this study except where indicated by the following superscripts: <sup>a</sup>[1], <sup>b</sup>[2], <sup>c</sup>[3,4], <sup>d</sup>[5], using [6]

## References

1. Zylstra P. Forest Flammability: Modelling and Managing a Complex System [Internet]. University of NSW, Australian Defence Force Academy. 2011. doi:10.13140/2.1.3722.0166
2. Gill AM, Moore PHR. Ignitability of leaves of Australian plants. Contract report to the Australian flora foundation. Canberra, ACT; 1996.
3. Kattge J, Díaz S, Lavorel S, Prentice IC, Leadley P, Bönisch G, et al. TRY - a global database of plant traits. *Glob Chang Biol*. 2011;17: 2905–2935. doi:10.1111/j.1365-2486.2011.02451.x
4. Onoda Y, Westoby M, Adler PB, Choong AMF, Clissold FJ, Cornelissen JHC, et al. Global patterns of leaf mechanical properties. *Ecol Lett*. 2011;14: 301–312. doi:10.1111/j.1461-0248.2010.01582.x
5. Dickinson K, Kirkpatrick JB. The flammability and energy content of some important plant species and fuel components in the forests of southeastern Tasmania. *J Biogeogr*. 1985;12: 121–134. Available: <http://www.jstor.org/discover/10.2307/2844836?uid=2&uid=4&sid=21105117046943>
6. Philpot CW. Influence of mineral content on the pyrolysis of plant materials. *For Sci*. 1970;16: 461–471.
