# Supplementary material for: Biophysical Mechanistic Modelling Quantifies the Effects of Plant Traits on Fire Severity: Species, Not Surface Fuel Loads, Determine Flame Dimensions in Eucalypt Forests
Source: PubMed Central journal article supplement (PMC4986950; doi:10.1371/journal.pone.0160715), 2016-08-16
Supplement: pone.0160715.s009.pdf [file pone.0160715.s009.pdf]

**S6 Table. Observed and predicted flame heights**

| SITE | Exogenous conditions |                      |       | Flame height (m) |         |            |      |      |
|------|----------------------|----------------------|-------|------------------|---------|------------|------|------|
|      | Slope (degrees)      | Wind velocity (km/h) | DFMC  | Observations     |         | Treatments |      |      |
|      |                      |                      |       | Minimum          | Maximum | F          | FS   | FSL  |
| 1    | 18.1                 | 19.3                 | 3.6%  | 12.0             | 24.0    | 3.2        | 1.0  | 14.9 |
| 2    | -2.3                 | 21.0                 | 3.6%  | 20.0             | 40.0    | 0.7        | 24.7 | 24.3 |
| 6    | -0.8                 | -1.3                 | 7.3%  | 2.9              | 4.0     | 0.6        | 1.4  | 4.1  |
| 7    | -1.0                 | -3.4                 | 7.2%  | 0.5              | 15.6    | 0.6        | 0.8  | 0.9  |
| 10   | -5.2                 | 6.2                  | 7.2%  | 1.4              | 2.0     | 0.5        | 3.3  | 2.8  |
| 11   | 1.7                  | 18.5                 | 3.6%  | 3.3              | 5.0     | 0.7        | 8.6  | 8.0  |
| 23   | 0.0                  | -13.1                | 3.6%  | 2.0              | 5.2     | 0.5        | 14.1 | 3.0  |
| 24   | 0.0                  | -13.1                | 3.6%  | 2.0              | 5.5     | 0.7        | 3.8  | 2.4  |
| 25   | -11.0                | 22.4                 | 3.6%  | 6.0              | 9.7     | 0.9        | 5.8  | 7.0  |
| 27   | 10.0                 | -5.5                 | 7.6%  | 0.7              | 1.0     | 0.7        | 10.1 | 9.2  |
| 28   | -0.7                 | 1.1                  | 8.7%  | 1.2              | 2.0     | 0.7        | 3.1  | 1.7  |
| 29   | -23.0                | 10.4                 | 7.4%  | 1.0              | 4.0     | 0.7        | 2.5  | 1.8  |
| 30   | 17.3                 | -20.6                | 8.8%  | 2.0              | 3.0     | 0.5        | 4.3  | 2.7  |
| 31   | 0.0                  | 5.4                  | 7.6%  | 1.4              | 2.0     | 0.7        | 3.8  | 3.1  |
| 32   | 5.1                  | -14.8                | 13.7% | 0.2              | 3.0     | 0.9        | 0.9  | 0.9  |
| 34   | -7.8                 | -7.2                 | 7.1%  | 0.1              | 0.5     | 0.7        | 2.1  | 0.4  |
| 36   | -13.2                | 2.7                  | 7.6%  | 0.1              | 0.7     | 0.4        | 0.3  | 0.4  |
| 37   | 8.5                  | -0.4                 | 7.6%  | 1.0              | 1.8     | 0.6        | 1.6  | 2.0  |
| 38   | -2.1                 | 1.2                  | 7.2%  | 2.0              | 8.0     | 0.6        | 3.1  | 3.2  |
| 43   | 0.0                  | -5.7                 | 3.7%  | 0.3              | 6.0     | 0.7        | 0.7  | 0.7  |
| 44   | -4.7                 | 4.9                  | 3.6%  | 2.0              | 4.5     | 0.7        | 2.6  | 2.2  |
| 45   | 10.8                 | 27.5                 | 3.7%  | 3.0              | 8.9     | 3.2        | 0.2  | 3.4  |
| 46   | -17.9                | 1.5                  | 8.2%  | 0.1              | 0.9     | 0.6        | 1.1  | 1.0  |
| 47   | -13.0                | -0.6                 | 8.3%  | 1.3              | 2.0     | 0.5        | 2.5  | 2.5  |
| 48   | -12.2                | 11.3                 | 12.4% | 1.1              | 2.0     | 0.7        | 9.4  | 0.5  |
| 56   | -0.6                 | 5.2                  | 13.5% | 4.0              | 6.0     | 0.6        | 1.6  | 6.3  |

|     |       |       |       |      |      |     |      |      |
|-----|-------|-------|-------|------|------|-----|------|------|
| 61  | 17.2  | 10.3  | 13.6% | 1.0  | 2.0  | 1.2 | 1.5  | 0.9  |
| 62  | -22.1 | -13.7 | 11.7% | 0.0  | 0.4  | 0.5 | 1.0  | 0.7  |
| 63  | 0.0   | 9.0   | 13.5% | 1.0  | 5.9  | 0.8 | 2.1  | 1.6  |
| 64  | 1.0   | 21.5  | 3.6%  | 2.5  | 7.4  | 1.6 | 0.5  | 1.8  |
| 65  | -28.5 | -5.6  | 3.6%  | 1.0  | 6.1  | 0.6 | 1.0  | 0.9  |
| 66  | -0.5  | 17.5  | 3.6%  | 2.0  | 6.0  | 0.7 | 25.3 | 2.1  |
| 67  | -8.6  | -14.7 | 5.9%  | 0.0  | 0.7  | 0.5 | 0.3  | 0.3  |
| 69  | -1.6  | -5.9  | 3.6%  | 0.1  | 0.6  | 0.7 | 2.9  | 1.7  |
| 70  | 11.6  | -20.6 | 3.6%  | 1.2  | 3.0  | 0.6 | 2.5  | 1.7  |
| 73  | 0.0   | 18.1  | 3.6%  | 2.0  | 7.0  | 1.4 | 2.8  | 2.5  |
| 77  | 3.6   | 23.9  | 3.6%  | 8.0  | 19.6 | 0.8 | 10.5 | 10.4 |
| 87  | 0.3   | -3.9  | 7.2%  | 1.3  | 2.0  | 0.6 | 4.1  | 2.6  |
| 89  | 8.5   | -12.0 | 3.6%  | 2.0  | 6.5  | 0.6 | 3.9  | 2.2  |
| 90  | 0.0   | 19.8  | 7.6%  | 0.5  | 2.0  | 1.9 | 1.0  | 0.7  |
| 91  | 20.7  | 28.7  | 3.6%  | 2.5  | 4.0  | 2.0 | 0.4  | 2.2  |
| 92  | 14.3  | 25.7  | 3.6%  | 2.0  | 2.3  | 3.7 | 0.7  | 0.3  |
| 93  | 17.9  | 30.2  | 3.6%  | 12.0 | 24.0 | 3.3 | 13.2 | 12.0 |
| 94  | -5.0  | 25.5  | 3.6%  | 10.0 | 20.0 | 1.4 | 10.8 | 10.0 |
| 95  | -18.0 | 25.5  | 3.6%  | 1.0  | 7.7  | 1.0 | 2.0  | 1.7  |
| 97  | -1.4  | 24.8  | 3.6%  | 2.0  | 3.0  | 2.0 | 4.1  | 4.7  |
| 98  | 0.0   | 15.9  | 3.6%  | 0.5  | 4.1  | 1.3 | 0.8  | 0.9  |
| 102 | -13.0 | 0.9   | 8.8%  | 1.4  | 2.5  | 0.7 | 3.0  | 1.6  |
| 103 | 2.8   | -18.3 | 7.6%  | 0.1  | 2.0  | 0.6 | 0.6  | 0.6  |
| 104 | 6.6   | -19.6 | 7.6%  | 0.1  | 1.3  | 0.7 | 0.7  | 0.7  |
| 107 | 0.5   | -6.4  | 13.7% | 0.1  | 2.0  | 0.3 | 0.3  | 0.5  |
| 110 | 14.6  | 8.7   | 13.0% | 2.0  | 5.1  | 0.7 | 3.3  | 3.1  |
| 114 | 4.0   | 20.2  | 7.6%  | 0.1  | 1.4  | 1.4 | 0.8  | 1.6  |
| 115 | 13.5  | 12.1  | 7.3%  | 1.6  | 2.0  | 1.0 | 23.4 | 2.9  |
| 122 | 13.9  | 7.8   | 6.8%  | 1.0  | 4.0  | 0.8 | 1.5  | 1.2  |
| 125 | 20.8  | 2.7   | 8.3%  | 0.5  | 1.0  | 0.7 | 2.5  | 1.8  |
| 126 | -3.1  | -4.5  | 6.9%  | 1.0  | 2.0  | 0.6 | 1.8  | 1.0  |
| 127 | 1.5   | 25.2  | 10.8% | 0.1  | 9.8  | 1.8 | 0.4  | 0.7  |
